# Supplementary material for: Physical workload and glycemia changes during football matches in adolescents with type 1 diabetes can be comparable
Source: PubMed Central journal article supplement (PMC6768890; doi:10.1007/s00592-019-01371-0), 2019-06-04
Supplement: 592_2019_1371_MOESM1_ESM.pdf [file 592_2019_1371_MOESM1_ESM.pdf]

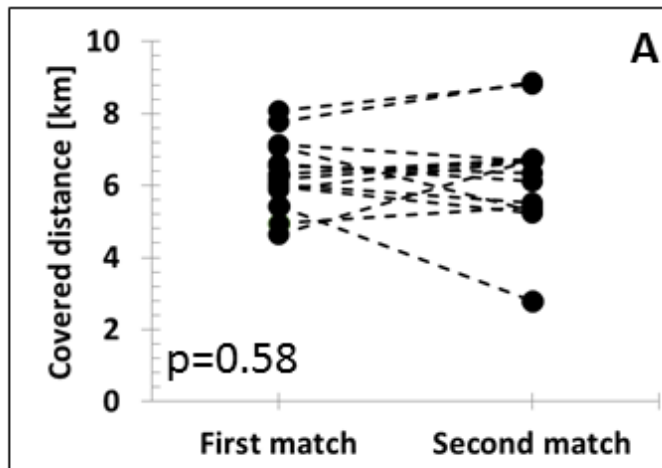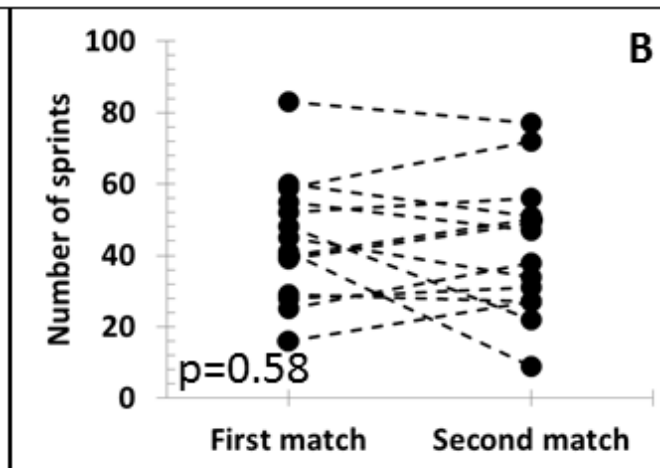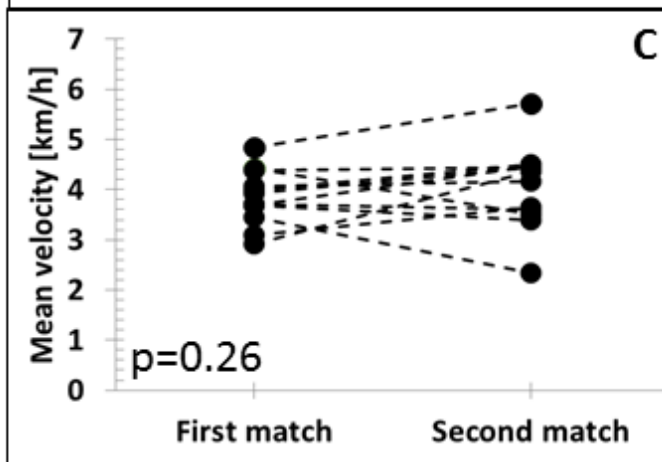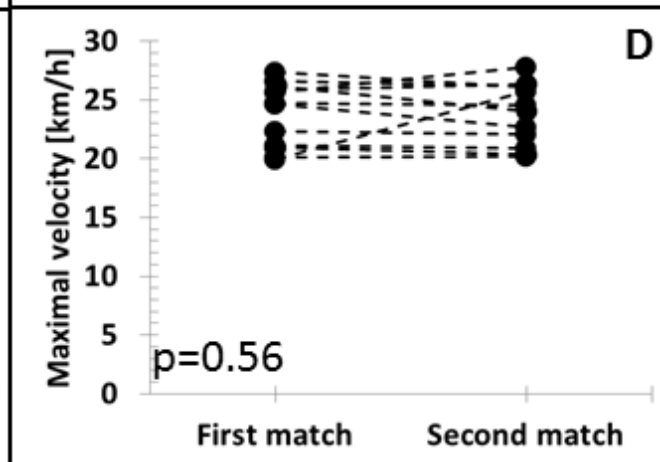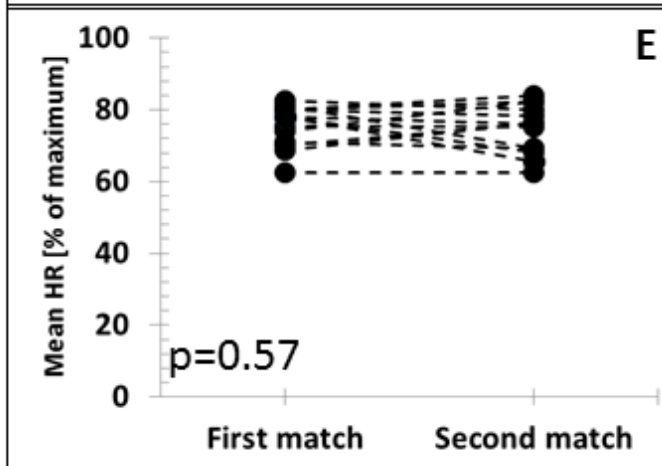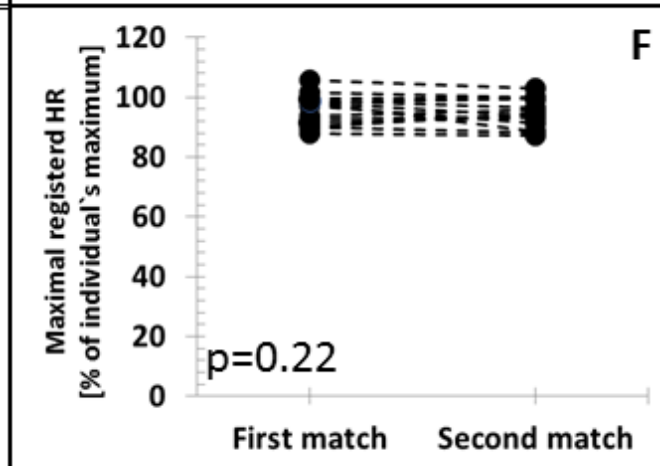

Supplementary Figure 1. The figure contrasts workload parameters measured with GPS-tracking and HR-monitoring systems: A – distance covered; B – number of sprints; C – mean velocity; D – maximal velocity; E – mean HR; F – maximal HR. The comparisons were assessed using the paired t-test and demonstrated no significant differences between the matches for individual players. For comparison of means and mean differences, refer to Table 1 in the main text.
